# Supplementary material
Source: PubMed Central journal article supplement (PMC5774253)
Supplement: en-159-826-sf1.pdf [file en-159-826-sf1.pdf]

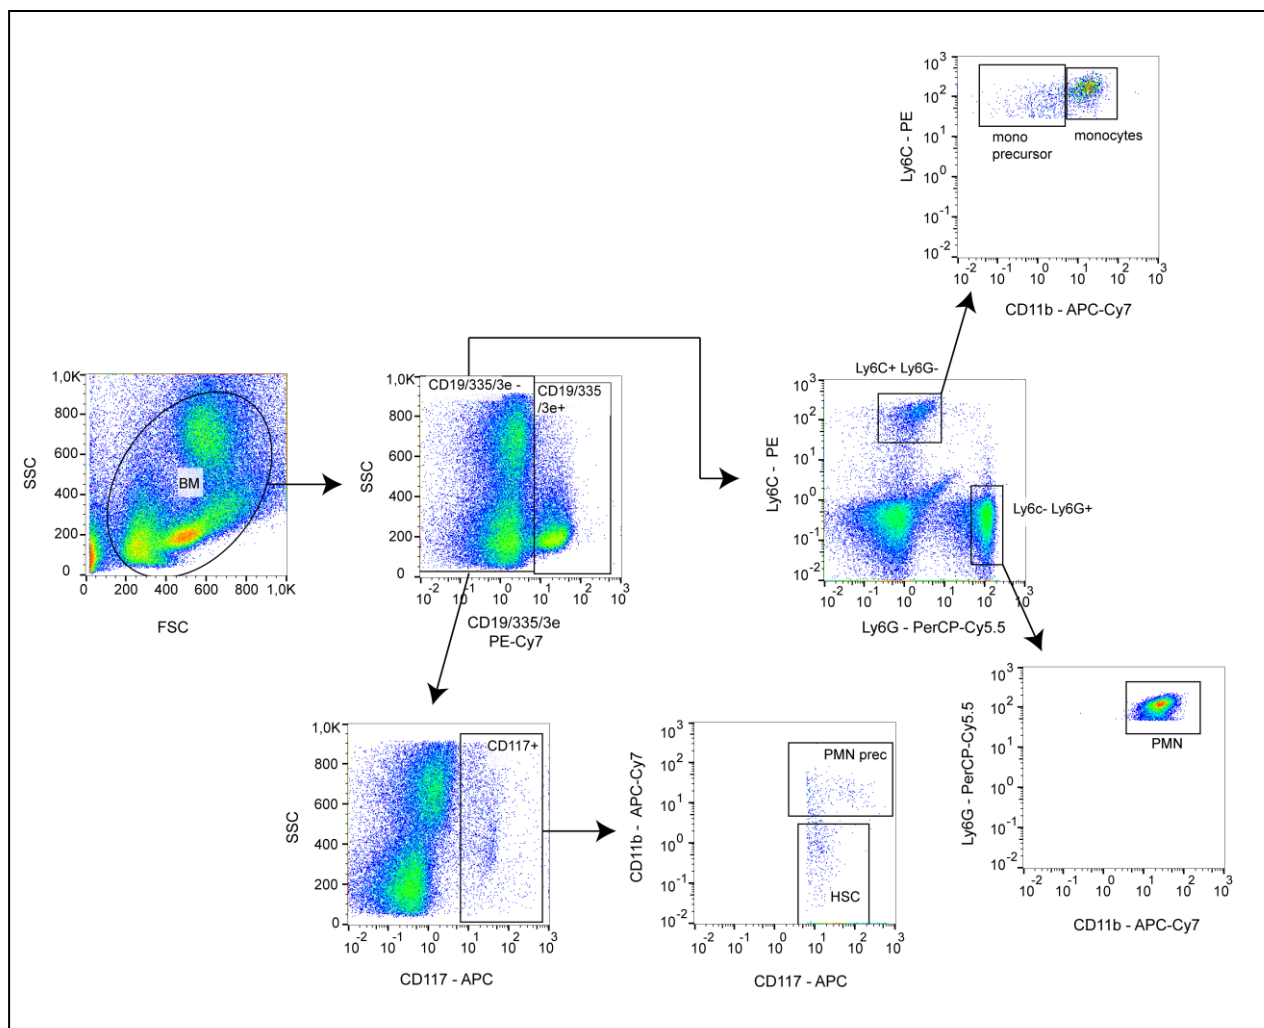

**Supplemental Figure 1.** Flow cytometry gating of whole mouse bone marrow. BM = bone marrow; HSC = hematopoietic stem cell; PMN prec = neutrophil precursor; PMN = neutrophil; mono precursor = monocyte precursor;

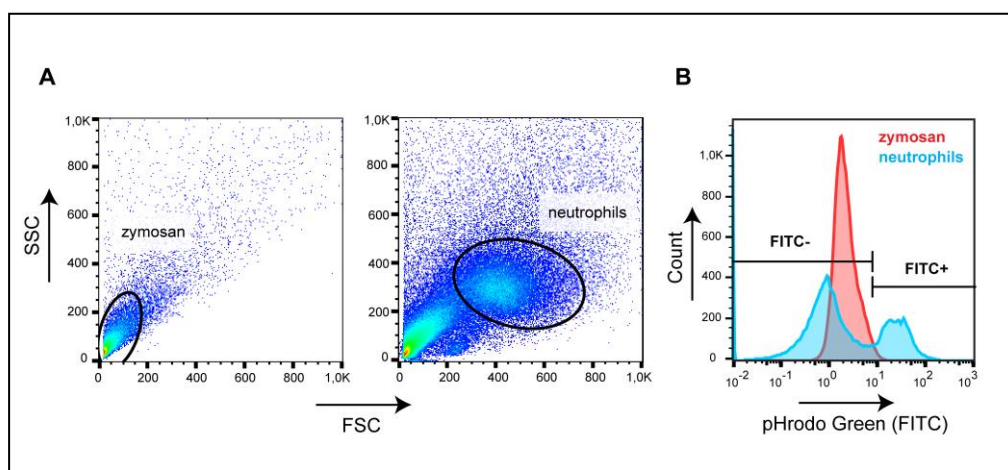

**Supplemental Figure 2.** Flow cytometry gating of D3KO and WT bone marrow derived neutrophils for phagocytosis. (A) Forward and side scatter (FSC & SSC) for pHRodo labeled zymosan alone or neutrophils with pHRodo zymosan. (B) Histogram for pHRodo Green. Neutrophils in FITC+ gate were considered phagocytosing.
